# Supplementary material for: New insights into the deactivation mechanism of V2O5-WO3/TiO2 catalyst during selective catalytic reduction of NO with NH3: synergies between arsenic and potassium species
Source: Royal Society of Chemistry journal article supplement (doi:10.1039/c9ra07545c), 2019-01-01
Supplement: c9ra07545c1.pdf [file c9ra07545c1.pdf]

## Supporting Information

### New insights into the deactivation mechanism of $V_2O_5$ - $WO_3$ / $TiO_2$ catalyst during selective catalytic reduction of NO with $NH_3$ : Synergies between arsenic and potassium species

Lin Li <sup>a,b</sup>, Lin Chen <sup>a,b</sup>, Ming Kong <sup>a,b\*</sup>, Qingcai Liu <sup>a,b</sup>, Shan Ren <sup>a,b</sup>

<sup>a</sup> Engineering Research Center for Energy and Environment of Chongqing, College of Materials Science and Engineering, Chongqing University, Chongqing 400044, China

<sup>b</sup> Chongqing Key Laboratory of Vanadium-Titanium Metallurgy and New Materials, Chongqing University, Chongqing 400044, PR China

*a, b\*) Corresponding Author: Ming Kong (M. Kong), e-mail: [ming.kong@cqu.edu.cn](mailto:ming.kong@cqu.edu.cn)*

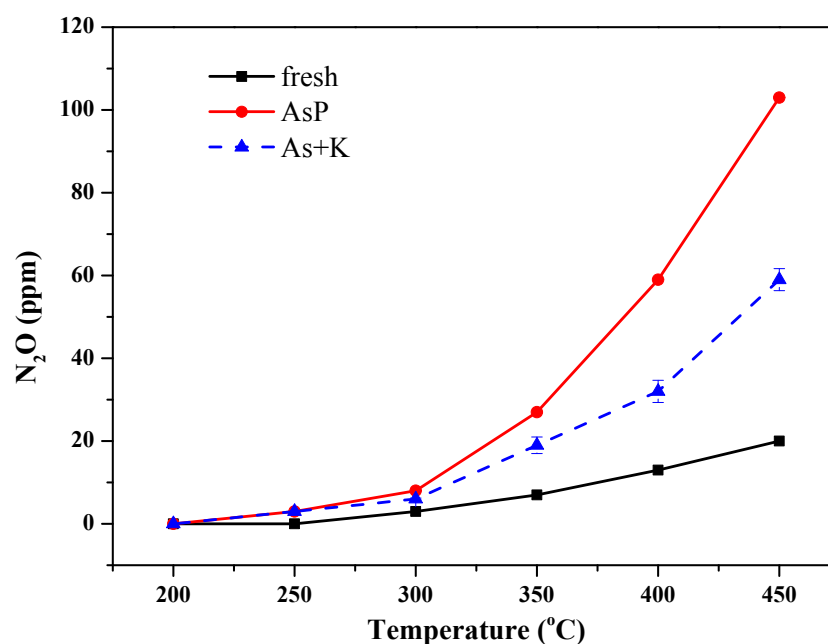

**Fig. S1** Concentration of outlet  $N_2O$

Reaction condition:  $NO=NH_3=500$  ppm,  $O_2=5\%$ , total flow rate=500 ml/min, GHSV=12,000  $h^{-1}$ .
